# Supplementary material
Source: publisher figshare collection journal article supplement (https://sage.figshare.com/ndownloader/files/13993172)
Supplement: Supplementary file 1 [file 13993172]

## APPENDIX

### Proof of Proposition 1

Firm's  $i$  objective function after the expression of the demand function has been replaced reads:

$$\pi_i = \frac{1}{2t} \left[ -2t(O_i + cD_i) + r(n(\sqrt{O_i} - \sqrt{O_j} + \sqrt{D_i} - \sqrt{D_j} + t)(\sqrt{D_i} - \delta\sqrt{O_j}) + n\sqrt{O_i}(\sqrt{O_j} - \sqrt{O_i} - \sqrt{D_i} + \sqrt{D_j} + t)\theta) \right], \quad i, j = 1, 2, \quad i \neq j.$$

The derivative with respect to  $O_i$  and  $D_i$  are:

$$\frac{1}{4t\sqrt{O_i}} (-2(2t + nr\theta)\sqrt{O_i} + nr((1 - \theta)\sqrt{D_i} + \theta(\sqrt{D_j} + t) + (\theta - \delta)\sqrt{O_j})), \quad (11)$$

$$\frac{1}{4t\sqrt{D_i}} (2(2nr - 2ct)\sqrt{D_i} - nr(\sqrt{D_j} - t + \sqrt{O_j}(1 + \delta) - (1 - \theta)\sqrt{O_i})), \quad i, j = 1, 2, \quad i \neq j. \quad (12)$$

Equating the above expressions to zero, we get the first-order optimality condition for an interior equilibrium and solving for a symmetric solution (1) and (2) can be easily obtained. Replacing these last expressions in the demand and the firm's profits (3) and (4) are derived.

The second-order concavity conditions ensuring an interior maximum for the symmetric solution (O, D) read:

$$\sqrt{D} + t\theta + (\theta - \delta)\sqrt{O} > 0,$$

$$D - ((\theta - \delta)\sqrt{O} - t\theta)((\theta + \delta)\sqrt{O} - t) + (t(1 - \theta) + (1 + \theta^2)(\sqrt{O})\sqrt{D}) < 0.$$

### Proof of Proposition 2

Replacing  $O_i = 0$  in (12) and equating to zero,  $D^{EDM}$  in (5) is obtained.  $D^{EDM}$  is positive if and only if  $t > nr/(4c)$ .

The optimal demand and profits in (6) and (7) can be easily obtained by substituting the expression of  $D^{EDM}$ . Therefore, if  $t > nr/(2c)$ , then  $D^{EDM}$ ,  $q^{EDM}$  are positive and  $\pi^{EDM}$  is greater or equal to zero. Note that  $nr/(2c)$  increases with  $n$  and  $r$ , and decreases with  $c$ .

The condition on the total demand  $q_1 + q_2 \leq n$ , taking into account  $q^{EDM}$  reads:  $(4c - nr)t \geq nr$ . This last condition is only feasible if  $4c - nr > 0$ , and if this is the case, it can be rewritten as:  $t \geq nr/(4c - nr)$ . Note that  $nr/(4c - nr)$  increases with  $n$  and  $r$ , and decreases with  $c$ .

It can be easily checked that  $nr/(4c - nr) \geq nr/(2c)$  if and only if  $nr \leq 2c$ . Therefore, the corner solution  $(O=0, D^{EDM})$  requires condition  $(nr \leq 2c \text{ and } t \geq nr/(2c))$  or condition  $(2c < nr < 4c \text{ and } t \geq nr/(4c - nr))$  in order to be feasible.

### Proof of Proposition 3

Replacing  $D_i = 0$  in (11) and equating to zero,  $O^{EOM}$  in (8) is obtained. The optimal demand and profits in (9) and (10) can be easily obtained substituting the expression of  $O^{EOM}$ .

If  $\delta = \theta$ , replacing in (9) and (10) one gets that the optimal demand is null and the optimal profits are negative. Therefore, this corner solution  $(O^{EOM}, D=0)$  is unfeasible when  $\delta = \theta$ .

From (9) and (10) the following conditions can be easily derived:

$$q^{EOM} > 0 \text{ if and only if } \theta > \delta,$$

$$\pi^{EOM} \geq 0 \text{ if and only if } 2t(\theta - 2\delta) + nr(\theta^2 - \delta^2) \geq 0.$$

Both conditions are satisfied simultaneously in the following two cases:

$$\theta > 2\delta$$

or

$$\delta < \theta < 2\delta \text{ and } t \leq \frac{nr(\theta - \delta)(\theta + \delta)}{2(2\delta - \theta)} \quad (13)$$

The bound  $\frac{nr(\theta-\delta)(\theta+\delta)}{2(2\delta-\theta)}$  increases with  $n$ ,  $r$  and  $\theta$ .

The condition on the total demand  $q_1+q_2 \leq n$ , taking into account  $q^{EOM}$  reads:  $(nr\theta(\theta-\delta)-4)t \leq nr(\theta+\delta)$ . This last condition is fulfilled if one of the following two conditions is satisfied:

$$nr\theta(\theta-\delta)-4 < 0,$$

or

$$nr\theta(\theta-\delta)-4 < 0 \quad \text{and} \quad t \leq \frac{nr(\delta+\theta)}{nr\theta(\theta-\delta)-4}. \quad (14)$$

$\frac{nr(\delta+\theta)}{nr\theta(\theta-\delta)-4}$  decreases with  $n$ ,  $r$  and  $\theta$ , and could decrease or increase with  $\delta$ .

Furthermore,

$$\frac{nr(\theta-\delta)(\delta+\theta)}{2(2\delta-\theta)} > \frac{nr(\delta+\theta)}{nr\theta(\theta-\delta)-4} \quad \text{if and only if} \quad nr < \frac{2}{(\theta-\delta)^2}. \quad (15)$$

Mixing conditions (13) and (14) taking into account (15), five possibilities as described below characterize the feasibility of equilibrium ( $O^{EOM}$ ,  $D=0$ ). The two firms exclusively undertake offensive marketing at the equilibrium if one of the following conditions is satisfied:

- $\theta \geq 2\delta$  and  $nr \leq \frac{4}{\theta(\theta-\delta)}$ .
- $\theta \geq 2\delta$ ,  $nr > \frac{4}{\theta(\theta-\delta)}$  and  $t \leq \frac{nr(\delta+\theta)}{nr\theta(\theta-\delta)-4}$ .
- $\delta < \theta < 2\delta$ ,  $nr \leq \frac{4}{\theta(\theta-\delta)}$  and  $t \leq \frac{nr(\theta-\delta)(\delta+\theta)}{2(2\delta-\theta)}$ .
- $\delta < \theta < 2\delta$ ,  $\frac{4}{\theta(\theta-\delta)} < nr \leq \frac{2}{(\theta-\delta)^2}$  and  $t \leq \frac{nr(\theta-\delta)(\delta+\theta)}{2(2\delta-\theta)}$ ,
- $\delta < \theta < 2\delta$ ,  $nr > \frac{2}{(\theta-\delta)^2}$  and  $t \leq \frac{nr(\delta+\theta)}{nr\theta(\theta-\delta)-4}$ . (16)
